# Supplementary material for: Cessation of photosynthesis in Lotus japonicus leaves leads to reprogramming of nodule metabolism
Source: PubMed Central journal article supplement — J Exp Bot. 2013 Feb 11;64(5):1317–32. doi: 10.1093/jxb/ert015 (PMC3598425; doi:10.1093/jxb/ert015), 2013-02-11

## Journal of Experimental Botany

### Cessation of photosynthesis in *Lotus japonicus* leaves leads to reprogramming of nodule metabolism

Daniela Tsikou, Chrysanthi Kalloniati, Mariangela N. Fotelli, Dimosthenis Nikolopoulos, Panagiotis Katinakis, Michael K. Udvardi, Heinz Rennenberg, Emmanouil Fliemetakis

**Table S1.** Primer pairs used in quantitative real-time PCR reactions

| GENE                                  | Lotus gene ID | Forward Primer         | Reverse Primer          |
|---------------------------------------|---------------|------------------------|-------------------------|
| soluble starch synthase SSIII,        | TC16679       | CCCCTTTGTACAGCATTAGTGG | CACCTTGCACCTTATTTACCGCT |
| Granule-bound glycogen (Starch)       | TC15808       | ATGGCCCAAGACTTTTCATGG  | AACCTCTAGGCTCAATAGCGCC  |
| soluble starch synthase               | TC15963       | GGACTGATGAAAAGAGGCATGA | CGTACTGAGTGGCTGCCTTTAC  |
| glycogen(starch) synthase isoform II  | TC16015       | GCTGAGTGAACGTGAATGCAAA | AGTTCCTTTCCCTAGCACAGGC  |
| Putative starch synthase              | TC11131       | ACCCATCACAGTGGAGACGAAG | CATTACCATCCCACGTCAAG    |
| Starch branching enzyme (EC 2.4.1.18) | MWM181h06_r   | TTTGATCGAGCTATGCAGCATC | GGTTGCCCTTTTGAAGACTAT   |
| Starch branching enzyme I precursor   | TC14733       | GCTTCAATAGGCTCAATCACGC | TCGAGGTGGTTCATCATACCA   |
| Beta-amylase                          | TC14465       | ATCAACCGGAAGTGCCTCAG   | GCAGATTCAGTGCCTTCTTCT   |
| Alpha-amylase                         | TC15116       | CCCAGGTTGGTGATGCACTAGT | AGTCCCTTCCAAGTGGTTCTC   |
| Beta-amylase                          | TC11242       | ATTTCAAAGCGGCAGCGAG    | CCTGCATCATCTGGTAGTTCCC  |
| starch phosphorylase isoform L        | TC14890       | CATTGAGCCAGTAAAATTGCCG | CCACATGGCACCAATTCTCTG   |
| Alpha-glucan phosphorylase, H isozyme | TC19579       | TCAGCAGTGACCCGACAATT   | CACGGCACTTCTATGTTCCA    |
| ADP-glucose pyrophosphorylase         | TC8396        | ACCTGCTGCGCGAAAAGTT    | CAATGGAAGTGCACCAGGAA    |
| ADP-glucose pyrophosphorylase         | TC8756        | TTGGTATTGGCAGGAACTCCC  | CCCAATTTCGAGCATTTTGT    |
| Cellulose synthase                    | TC14362       | GCTTGCATCCATCTTGACCCT  | GGCCATCTCTTGACACAAAAGG  |
| Cellulose synthase                    | TC9552        | GGTCTGGTCCATTCTTCTTGCA | TGTGGTGAACGGATCAACTCG   |
| Phosphoglucomutase, cytoplasmic       | TC14676       | CCCCACTGGTTGGAAGTCTTT  | TCCCAAAACTTCTTCCACCGC   |
| Phosphoglucomutase, cytoplasmic       | TC14675       | TTCTTGGCTTCCCTCTGCTATG | TCCCTGGCTCTCCAATCTCAT   |
| Phosphoglucomutase, Chloroplastic     | TC10716       | AAAACCACTTCCACAATCAGC  | AACCGAACTCGAGCTCTTAGGC  |
| Glucose-6-phosphate isomerase         | TC17137       | GCCACGCTCCAGAAGATATTGA | TAGTGCTCTATCGTTGGCAGCC  |
| Cytosolic phosphoglucomutase          | TC10203       | AAGATTAACCGCATGTTACGCG | TACGTGAAGCACCGACCTATCC  |
| Cytosolic phosphoglucomutase          | TC14615       | CAGCTCGTTTCTCGGTTTTTC  | CGGTATTCATTCACGAGGAG    |
| Glucose-6-phosphate isomerase         | TC17714       | CAGAGGCATTGGCTCCTGATAA | CCAGCAGGATCTGTGTTGCAA   |
| Hexokinase-related protein 1          | TC16473       | AAGCCTAGCTGGTGCAGGAATT | CTTCCACAAAATGAGGCCTTTT  |
| Hexokinase                            | BP029610      | GGCTGTGATTTTAGGCACTGGA | TGGTATTGCCTGAGCACGTTT   |
| Fructokinase                          | TC14218       | TTGTCACTCTCGGTGAACATGG | CGCTGTTGTATCAACCGTGT    |
| Fructokinase                          | TC15313       | TGAGAAACGACTTCGAAAGGC  | CAGTTACAGTGTGGCACCACA   |
| Vacuolar acid invertase               | TC15378       | TTGAGAGCTTTGCTCAGGAAGG | GCTGCCCATATATTGCTTCTG   |
| Vacuolar acid invertase               | TC12904       | AATTGGAAGGCAGCGCCAG    | GCAACAATGTCCAAGTGTGTGG  |
| Beta-fructofuranosidase               | TC16805       | CAGAGTTTATCCACATTGGCC  | CGCGATCTTGACATCAGCAGT   |
| Beta-fructofuranosidase               | TC16741       | TGAAGGAAGCAGAGGTTGGCT  | GCTGTCCCTATCCCGCTTAGCT  |
| Cell wall invertase                   | AV407850      | TCGTGAACTGGACCCCACTAGA | GCCGTTAATATCGGACGGTTG   |
| Fructan 1-exohydrolase                | BP071102      | TTTCAGCCCCAGCAAACTG    | CACCTTTGTGGTACATAGGCC   |
| Neutral invertase                     | TC16464       | AGAAAAGTGTCCCGTGTGCT   | GCTTCCAGATAAGGCAGAGCCT  |
| Neutral invertase                     | AV420108      | CTGGCAGTTCACCTTAGCCTGC | AACCGCCTTCTGTGCCAAA     |
| Sucrose synthase LjSUS2               | TC10121       | TGGTGATTTTCGGTGGATTGTC | TAGCGATACAGCTCCCCGTTAC  |
| Sucrose synthase LjSUS2               | TC17628       | TTTGTAGGACCTGCGATCCAG  | TAGGCCAGCTGATCCATGTAG   |
| Sucrose synthase LjSUS2               | TC18457       | TCTTCATGCTCCTGATCCGTCT | GAACACCATAGGCACTCTCCCA  |
| Enolase                               | TC14118       | CTGATCTTGGCGTTGGTTGTC  | TTTAGCGAGACGCTCAGACCTG  |

|                                        |             |                         |                         |
|----------------------------------------|-------------|-------------------------|-------------------------|
| Enolase                                | TC17682     | TGCTGAAAAGTGCCATTGACG   | GCGGAATGCATAAGGTGCAA    |
| Enolase                                | TC16760     | TTCAGGCTGCACTTGACTCAAA  | AGTCTCGCCACTCCGATGACTA  |
| Triosephosphate isomerase, chloroplast | TC8011      | CCGAGCGAAGACATATCATTGG  | CGGTCAAAGCATAGGCAGCTT   |
| Triosephosphate isomerase, cytosolic   | TC14860     | TGTTGCTGCTCAAAACTGTTGG  | TCAGACTAACCTCCCCGGTAT   |
| Pyruvate kinase                        | TC14988     | CACCAGCAAGGCACAGCTTAA   | AGCTTTAGCAGATCCCCTAGCC  |
| Pyrophosphate-dependent phosphofruct   | TC15070     | ATCCCAAGAGTGCCCATGAAG   | CATCCAGAACTGGTGGTCCA    |
| Pyrophosphate-dependent phosphofruct   | TC10213     | TTTGCCCTCCTTGCAGATGA    | TTGGATCGGACCTGGACTGAT   |
| Glucose-6-phosphate 1-dehydrogenase    | TC8851      | GCAGTTTGTGTTGGAGTGCTG   | GATTTACGTATGCCAACCATG   |
| Glucose-6-phosphate 1-dehydrogenase,   | TC16472     | TGAGCTTGTTATCCGCCTACAA  | AGTCCAGGTTGCTTACCCTGA   |
| Putative 6-phosphogluconolactonase     | LjNEST74h5r | CCTCACTTCCAAACCCAGCAT   | CCGCCATTGAAGCTTCTGTA    |
| 6-phosphogluconate dehydrogenase,      | TC8770      | TGGACAAAACCTGGCATGAAGG  | GCAGGAACTGATAATTCGGCAG  |
| Cytosolic 6-phosphogluconate dehydro   | TC15545     | TGGCTACCATGACCCTGAATCT  | CAAGCATTATGACGACCCTGG   |
| Ribose-5-phosphate isomerase precursor | TC7994      | TCCTATCATCCCCTTTGAGCG   | ATTCTGAGGAACCAAGCAAGCA  |
| Probable ribose 5-phosphate isomerase  | TC14838     | AACCCTTTGTCACTGACCATGG  | GGCAGCCTTCAAATCACCAA    |
| Ribulose-phosphate 3-epimerase, chlor  | TC7925      | TTGGCACCACCAGCAATTG     | AACACACATCACTGCGGAAGC   |
| D-ribulose-5-phosphate 3-epimerase     | TC15403     | CAACTATAGACATGGCCGCGT   | CCAAACACTGAACTTCCAGCAA  |
| transketolase precursor - potato       | TC9340      | TCCTGGTCTGCTTGGTGGTAGT  | CCCAAACATTTTCAGCAAGGTC  |
| Transaldolase                          | TC14521     | TTAATCTACGTGGCAAGGCAGC  | CCCACCTTGGACCAGAAAATTT  |
| Transaldolase                          | TC11589     | CCTGTTTTCTGATTTGCTGCCAT | CGCTGGATTGGTAGTGACACCT  |
| Transaldolase ToTAL2                   | TC10369     | GCTGCAAAAATCCTGAGGCAA   | TTCGCCAAGTCAGTACCGACA   |
| Trehalase 1                            | TC18454     | CAGACTGGTTTTGGCTGGTCA   | GCCATCCAAACTCCTCCAAGA   |
| Trehalose-6-phosphate synthase         | TC8431      | GAAGTGTTCCCTTTGTGCCGTT  | GCCTTGCAGCATTCTCAGAATC  |
| Trehalose-6-phosphate synthase         | TC9466      | TGCCAGGTTTAGCCTGTGTTT   | CAACCATTATCTTTTCCAGGCC  |
| Trehalose-6-phosphate synthase         | TC14996     | GCCAGGCCAAGTATTACTTGGA  | GCAAGGCCATGCAACATTCT    |
| Trehalose-6-phosphate synthase         | TC19005     | AAGTGTGATGCCAGACATGC    | GCAACCACAACAACCCTAGCA   |
| Trehalose-6-phosphate phosphatase      | TC16872     | CAAGGAAAGCCACGCATTTT    | CCGCGAGTGATTTGAGGAAAT   |
| Trehalose-6-phosphate phosphatase      | LjU20       | TCATGGAGCAGTTTACGCACA   | CCCGGAAATTTACACTTGCCAC  |
| Aconitase (Aconitate hydratase)        | TC14176     | AGCACCCACAGGCTTGATTT    | CATTGAACTGACCTTTGTCTCCC |
| Cytosolic aconitase                    | TC15109     | TCACCAAAGGAAATCCCATGTG  | CCCAGGCATAAAGATTGCCAG   |
| Aconitate hydratase, cytoplasmic       | TC14371     | CCCATTGAAAATGAGGCCAA    | ATAATGCCCGCCCACAATC     |
| Isocitrate dehydrogenase (NAD+)        | TC14549     | GCTCCTGATATTGCCGAAAAG   | CGTAACACCACTCAGCAGCAAG  |
| NADPH-specific isocitrate dehydrog     | TC7991      | CCCTGATGGAAGACCATTGAA   | TTCCCCACCCTTCTGATGAAC   |
| Cytosolic malate dehydrogenase         | TC7834      | CCTACCAGGAAAAGGCTTTGG   | GGAACCAGCAAATGGCAGTAGA  |
| NADP-dependent malic enzyme            | TC17304     | TGGCTTCTCATCTACCTCGACC  | GGCTGTACATGCAACTTTCTGC  |
| NADP-dependent malic enzyme            | TC8784      | TCCACCATTACCAACATCAGA   | AGCCTTAGCAGCAACTTTGGC   |
| NAD-dependent malic enzyme 1.1.1.39    | TC16102     | CGGCCGTGAATTATGCGTAT    | CATCAACGCTGCCTCCAATAG   |
| Malate dehydrogenase mitochondrial     | TC7960      | GTTCCAGTTGCCGAGGTCAAT   | GGCTTGTGGTGTGCTTGAGA    |
| Phosphoenolpyruvate carboxylase        | TC14124     | ATAATGTGAAGTACGCCCCC    | TCATCCGCAGGTTTACTCACG   |
| Phosphoenolpyruvate carboxylase        | TC7830      | GCGTGTGACAGTTCAAGGTGA   | ACGCTGCAGTGTCTAAAAGCAC  |
| Phosphoenolpyruvate carboxylase kinas  | TC14602     | GAAGGTGGATGTGTGGAGCTGT  | GCCGCAGAATCACCGTAAAA    |
| RuBisCO subunit binding-protein alpha  | TC8373      | GGAGCTGACATTGTGCAAAAAGG | AACTTCCCCCTTACTCCAGCA   |
| Ribulose bisphosphate carboxylase      | TC19857     | GAACGAGATCCAGGAATGCAAA  | TGTCAAATGCAATGCAGCGT    |
| Ribulose bisphosphate carboxylase      | TC14081     | ATTGTTGACACCTTCCCTGGTC  | ACACTTAGCCCTCAATGCACC   |
| Carbonic anhydrase LjCA1               | TC14306     | CACTGAACCCCATGAGTTGACA  | CATGCTTCAGAGCCTCCCTACT  |
| 3-deoxy-D-arabino-heptulosonate        | TC8510      | GTCACCTTCGATGACCTGAGCT  | ATTGAGAAGCATTGAGCCTTGG  |
| chorismate mutase                      | TC14425     | GTTTTTGTGGCTATTGGTCTG   | AGCCATAGCTTGAATGGCCTC   |
| Phenylalanine ammonia-lyase 1          | TC9381      | TGGAAGCCATAACCAAGCTCA   | ACAAGATCACCGAAGCTGTG    |
| Phenylalanine ammonia-lyase 2          | TC18515     | CACCAACAGCCAAAACAGTTCC  | GCCACACCCCAATTTAATGGA   |
| Chalcone reductase                     | TC8351      | CCACAGCGCAGGCAATACTTA   | CCAAAGTTCTTCCACGGTCTTG  |
| Chalcone synthase 4                    | TC7870      | CAAACCTTTAGTCTTCGCCCC   | ACCTGCAAAGCACCTTGTGTG   |
| mRNA for chalcone isomerase            | NP645869    | AACAAGGCACTCTCAGAGGCAG  | GCCAAAAGAAACAACGCTTCA   |
| 4-hydroxyphenylpyruvate dioxygenase    | TC8682      | ATCCGAAACCAACACTCACTC   | ACCCGGTTTGGACTTCTTCAG   |
| Putative flavanone 3-hydroxylase       | TC7931      | CGTTGCCTATTTTCATTGCCC   | TTACCAATGCCTTTGCAGGTTT  |
| Cytochrome P450, Isoflavone synthase   | TC14262     | TGGAGGAAAAGAGCTGGTCTCAC | TGCAACCTTGATCTTGCAAG    |
| Probable ribose 5-phosphate isomerase  | TC14838     | TCAGGACCGGAAAAATGAAGC   | TTGGCTGTATCGAGTTGCGTG   |
| Sucrose synthase LjSUS3                | TC7847      | GCCAACATTTGCTACCTGCAA   | TAAATCGGCAGCAGCGTCA     |
| Sucrose Synthase LjSUS1                | TC7848      | CCAATTACAGTGGATTTCTCTA  | CATAGATTGCAGGCTGCACAAA  |
| Alkaline/neutral Invertase 1           | CAG30577    | TCCTGCCGAATGGATTTTC     | TCATCCCAGCGAGCTTCAATAA  |
| Ornithine decarboxylase                | CAC02644    | TGCAAAATCCGAGTCCGACA    | TCATAGGTTGCGAGGTTGACG   |
| Arginine decarboxylase 1               | CAE02645    | GGTGTTCCTCCATTATCCCCATT | GAGAGGATGCCTTTCACAGTGG  |
| Arginine decarboxylase 2               | TC5158      | AGAACATGTCTTCTGCAACCATT | CTTGAAGTCTCGGCCGTAGC    |

|                                            |              |                         |                         |
|--------------------------------------------|--------------|-------------------------|-------------------------|
| Spermine synthase                          | Ljnest12b2r  | AGATGCACACAGCTGCTTTCG   | TAAGCGGAAGGATCACGGATC   |
| Spermidine synthase                        | TC10068      | GACATTGTGGCAAACCTGTCGC  | CGGTGGTCCAAGCATAGTTGAC  |
| Pyruvate decarboxylase I                   | Ljnest11h9r  | GCTTGCGAATTGTGGTTATGA   | TAGCGCCTACTGACCAACCAA   |
| Pyruvate decarboxylase II                  | TC7922       | GTTGGTGCAACCCTTGCTAT    | CCATCACCAATGCAAGCAATC   |
| Alcohol dehydrogenase                      | Ljnest14brc  | AGCATCCAGGCCATGATCTCT   | AGTACAGCAACACCCCAACCAT  |
| putative NADP-GDH                          | Ljnest22b7r  | TTGCCAACTCATGCTTGCT     | TGCGATCTTTCCAGAACCACTC  |
| NADPH-dependent mannose 6-phosph           | TC15046      | GGAAACTACCTGGCATGCGAT   | ATCCCTATGCTGCGAACCAAG   |
| CA a-type 1                                | Ljnest13e5   | TGAGATCAATGCAAGGCCAAC   | CCCTTCACACCACATTTGGAGT  |
| CA a-type 2                                | Ljnest20a7rc | ATGCCCAAATTCCTATCGGC    | CCGTGTGTGTCTCTTGCAAT    |
| proline oxidase                            | TC7864       | CGTTGAAGACGCCAATGACA    | TCTGCTGACATCAACGGTGTG   |
| sucrose-UDP glucosyltransferase            | TC7848       | CGGCCTCATCGAGACATACAA   | GGTCCATCTGTGAGGAAATCCA  |
| 14-3-3 protein GF14omega (grf2)            | TC7839       | TTCATGGAGAAAGTCTCCGCC   | GGTCTCTTCTTCCACCGTGA    |
| monodehydroascorbate reductase             | TC15657      | ACATGTTGACCATGCTCGCA    | ACTGTTTTCCCATCTCAGCTG   |
| acidic endochitinase                       | TC14167      | CATCGAAGGCGGTACAAACCT   | TTGTGTCTCAAAGCGTGCAGG   |
| Nitrilase 4 (sp P46011)                    | TC14107      | GCCTCCACCATCTTCTACGACA  | AGCAGCTTCAGCCAGCAATCT   |
| thiazole biosynthetic enzyme precursor     | TC14068      | CTTACCACCTCCACCCTATGA   | ACAATGGACTCCTTGATCGGC   |
| chalcone isomerase                         | NP591666     | TCAATTTCCGGCGTGCATTA    | TGCGCCACCAAGGAAATAAG    |
| putative chalcone isomerase                | NP591668     | CAGCCACCGCCAAGTCTTATT   | CCCTCAATCGTCAACCCTCTCT  |
| Isoflavone reductase                       | TC7899       | ACATTGAACAAGGCTGTCCACA  | CCCACAATGCCATGATCTCA    |
| Cytochrome P450                            | TC15466      | CATCTACCATCATGACCCTCGC  | TGAGCTGTGCCAAAGCAAGAG   |
| cytochrome P450                            | TC8343       | CTTTCGTTGTCCACACCATCG   | GGTCTTGGTCCAAGCCACATAA  |
| Trans-cinnamate 4-monooxygenase            | TC14933      | AACCTCGTCGTTGTCTCATCCC  | ATTGACACCCCTGTGTGTGGAG  |
| Prolyl 4-hydroxylase                       | TC15896      | CAAGATCGCGTTCCCTTCTGT   | CGAAGAATCCAGCGAGGAAGA   |
| Prolyl 4-hydroxylase, alpha subunit-like   | TC11925      | TTCCCAATGCATCCTCTGA     | TTGCGAGCGATGGAGTTGA     |
| Putative oxidoreductase                    | TC14685      | CCCCCTATAGTTGTCTGTTGCAT | TGGTGATTCTGTTGGAGTTGG   |
| N-hydroxycinnamoyl/benzoyltransferase      | TC8570       | GGTTGCTCAGGTGACCAAGTTC  | CCAATGCCATCAAACATGCA    |
| Isoliquiritigenin 2'-O-methyltransferase   | TC14525      | CAGCCTTGAAATGCCTTCTGA   | CGAGCCTGTTTGGCAAATCA    |
| 4-coumarate:CoA ligase 2                   | TC7977       | GCATGTTGATTGCTCACCCA    | CCTGCAGCTTTCATCTTCAAGG  |
| Laccase                                    | TC17617      | ACGCAACACAATTGCTGTGC    | CCCTGGATTGTTTGTCTGGA    |
| Putative diphenol oxidase                  | TC20034      | TCCAGGTGTATGGTTCATGCAT  | TCATAGCCATTCCCCAACGT    |
| Putative diphenol oxidase                  | GENf079a06   | GGCATCACAAGTTCGAGGTGA   | AAGAGTTGGCCCAGGAAACTG   |
| Copper amine oxidase                       | LjNEST6a8r   | CAGCCACTTCTCAGACCTGTT   | TAGAGCCCAGCAGCAACTTCA   |
| Amine oxidase                              | TC11726      | CTGGCATGATGGTTACGGAAAGT | CCACTGCTACTGCAATCCGAA   |
| Similarity to ornithine cyclodeaminase     | TC11292      | ACCCCAATTGCCCCAAAGCTA   | ACCAAGAAGGCATGAGGAGGAG  |
| Proline dehydrogenase                      | TC7860       | GGAGTTTGGCTTCGTCTTTGG   | TGTGCGTGTCTGGATGGTAT    |
| Proline dehydrogenase                      | TC7863       | ACCACACACCGAAAAGACCTGA  | TGGCAAGTTGAAGTTCGCTCT   |
| Pyroline-5-carboxylate reductase           | TC15604      | AACGTCGTCATTTCTCCGTGA   | AGCGGCTTCAACTTCAACACC   |
| Ornithine aminotransferase                 | TC8388       | TCCTTGCCAAGCCAACACAT    | GCTTCCAGAATCTCATCCCGA   |
| Delta-1-pyrroline-5-carboxylate dehydr     | TC8648       | TGGAGATCAGGTTCCGGTTCCT  | GGCTTGTGTGCCAAGATGA     |
| Choline monooxygenase                      | TC17741      | CAGAAAAGGTCTCCAATCCCCA  | GCCTGTCTCCACTGTAGGAACAT |
| Betaine aldehyde dehydrogenase             | TC16536      | ATCCGATCATCAACCCCTCC    | CCTTAGTAGCCGCCGAATATC   |
| NAD-dependent sorbitol dehydrogenase       | TC17752      | GAAATGACTGTCCCCTCACC    | GCGGAAAATGCCAATCACA     |
| NAD-dependent mannitol dehydrogenase       | TC10721      | TGGCGATGATGATGTTGCTATC  | TGTGCAGATCAGAATGGCAAAC  |
| Putative cinnamyl alcohol dehydrogenase    | TC8891       | TGAGTTTGTCTGGTGCAGACC   | CGATTTAGCCAATGCCCTCAT   |
| Aspartate aminotransferase                 | TC14495      | ATACCGATGGCTCCACCTGAT   | TGAGATCGCATTTGTCCCG     |
| Glutamine synthetase chloroplastic         | TC14146      | GCTGGAATCAACATCAGTGCC   | CCAATTGATACTCCCCTGCC    |
| Glutamine synthetase, cytosolic isozyme    | TC8035       | TTTGGCCGTGATATTGTGGAC   | CTGATGTTACACCCGGCATAAA  |
| Glutamate dehydrogenase                    | TC10844      | CCGGAACATAAAGGCAATGTGT  | TCCAAGAGTGAAGGCTCCCAT   |
| NADH glutamate dehydrogenase               | TC10856      | CCGTGAGCTGCAGAAGTACATG  | GTGAGTTTTGCACATTGCCTTG  |
| Asparagine synthase                        | TC14104      | TCCACCAAGAAACATGCAGC    | GTTGGCACGCAAACAATCAT    |
| Asparagine synthase                        | TC8451       | GCAACCACAAAAGCTGCTGAA   | TGAACCTCAAGGCCTACACAG   |
| Uricase                                    | TC14572      | TGGATGGTCAACCTCATGAACA  | AGCCTCTGTGTATGCTTCTCG   |
| Probable 2-isopropylmalate synthase        | TC14289      | GCCAGGAGTTTGGTTGCACTG   | TGTCCGATCTTGACGATCTT    |
| Branched-chain amino acid aminotransferase | TC16062      | ATGAGATTGTGCCACGCGA     | TGAGTCACTCCTTGACAACC    |
| Alanine:glyoxylate aminotransferase 2      | TC9107       | CATCTCATTCGCAACCTCCAA   | GGAAAAGCTGCTGCATGCA     |
| L-asparaginase                             | TC8339       | TTCAACTCTGGTCTGGATCTG   | TGCTAGCCTCAATTTCCACAG   |
| Alanine aminotransferase                   | TC14752      | GCGTGCAAAGATTCTGGAAGAT  | TGCTTTGTTGCATGTTACACC   |
| Histidinol dehydrogenase                   | TC10151      | TGAAGCCACAAGAGAGCTGTT   | CTGAACCTGCCTGGCTTCTATG  |
| Glycine dehydrogenase                      | TC14097      | TTGGCATTGACTGCGTTGAA    | AGCCGAGCCAACGACAATATC   |
| Serine hydroxymethyltransferase)           | TC9418       | TGGCAGCAATGGCTTTATACCT  | TGATGCTTTGCATGGCTTGA    |
| Methionine synthase protein                | TC8911       | CCGCTGTGTCAAACCACCTATC  | AAGACGGTCATCGGCTTAGGAC  |

|                                          |             |                         |                         |
|------------------------------------------|-------------|-------------------------|-------------------------|
| S-adenosylmethionine synthetase          | TC14111     | TGAGGCAAGCTGCTAAGAGCA   | CCAATGGCATAGGAAACCTGG   |
| S-adenosylmethionine synthetase          | TC14110     | TGAGATCACAAACCAAGGCCAA  | CGATGTTCTTGCAAGTGGTCT   |
| Methionine synthase                      | TC14073     | AGAACGACCGCAGAAAACCTGG  | TGCGACGCCATTCTCTGA      |
| Cystathionine-gamma-synthase precurs     | TC19008     | ATGAAAACGCTGCATCTCCG    | GCCTCTAAAAAGTTTGGCCATCC |
| Adenosylhomocysteinase                   | TC7865      | TGACCCTGGAGGATGTTGTCTC  | TGATGTCCTTGTACCAGGTGG   |
| serine O-acetyltransferase               | TC11304     | CACTCTGAGTGATGCTGGATGC  | CCACGGTGTITAGCAGCTCTTC  |
| Serine acetyltransferase                 | TC17048     | CGCCGTCTCTCTAAACCACACT  | TTCGCCGGTTGGCATTAGT     |
| Serine acetyltransferase 1               | TC18157     | CCCAGTTTCTCCGATCGTGTT   | GCGAGGTTTTGTCACGGTCT    |
| Cysteine synthase                        | TC8523      | TAGCCTTCATGGCAGCAGCTA   | CTCATTGAAGCAGGCATCGTAA  |
| Cysteine synthase                        | TC14692     | ACCATTCTTCGAGCTTTCGGA   | AGCCTTCTGAACAGCTCCCTTC  |
| Cysteine synthase, chloroplast precursor | TC10541     | CGGTTTTGTGCTGTGAATTGTG  | TGGAACACGATGATGATGGAGA  |
| O-acetylserine (Thiol)lyase              | TC8232      | CCCAGCTTTGGAGAGCGTTAT   | AGACCATGCTCTCTGCTTCTCG  |
| Adenosine 5' phosphosulfate reductase    | TC14588     | GCATTCACAAACGCCATCAAG   | AGGCCCATCAAGTATCCCTCAG  |
| Plastidic cysteine synthase 1            | TC17110     | ATTTCTTCAGGAGCTGCTGCC   | TCCCGCATTCTCAGGTCTCTT   |
| Aminodeoxychorismate synthase            | TC15188     | TGCACCGAAGTTGAGATCCA    | TGCAGCCTGAGTAGATACCTCG  |
| Anthranilate synthase alpha subunit      | TC10990     | TTCCCTGGCTGAAACTTTGATG  | GCAAGCAGAAGCTGCAGAACA   |
| tryptophan synthase beta-2 chain precur  | TC20070     | CACATCTTCACCGCAATTGA    | TGAGTTGAGGCTTGCCTGGA    |
| threonine dehydratase/deaminase          | TC18952     | TCGCCATTGAGTCCCCTTT     | TGAGCCAGATGTTAACGCCA    |
| Precursor monofunctional aspartokinase   | TC14781     | AGCAGAACCTGTCCCTCATTG   | GATGCAGAACCTGAGCACCAA   |
| Aspartokinase-homoserine dehydrogen      | TC9572      | TTCGACCAGATGTTGCCAAG    | ATCTCAAACTTCCCCAGCGT    |
| threonine synthase                       | TC9527      | TTCAGATTGGTGACCCGGTTT   | CCACCATAACTCTCAGCGCAT   |
| dihydrodipicolinate synthase             | TC18091     | TGAGCCAACCCCAATTGCT     | AACTGGCTTGACAACCCCAAG   |
| amino acid acetyltransferase (N-acetylgl | TC18260     | ATTGCTTGCGCTTCCCTTATTC  | CAATGGCAGCAATCTCACCAC   |
| amino acid acetyltransferase (N-acetylgl | TC18465     | CAAACCTGATTCCCAGGTGATG  | GGTCCCTTTCTGGATCCCATT   |
| N-acetylmethionine deacetylase           | Ljnest56a2r | CTGGACAGAGATTCTTCGTGC   | GGAGGTGTAAGAATTCGCCGAT  |
| Beta-cyanoalanine synthase               | TC14185     | CTGGAATCCACACCAAATGCTT  | AATGCACCTGAGTGTGGCAG    |
| pantoate--beta-alanine ligase            | TC12836     | AAGCTGGAGAAAACCCCTTTGTG | ACAATGGTGGCAACCCCTCTA   |
| 1-aminocyclopropane-1-carboxylate        | TC14222     | TGATTGCTCAAACAGATGGTGC  | GCATCATCCCCTGGATTGTAGA  |

**Table S2. Gene expression in nodules after prolonged darkness:** Gene expression in *L. japonicus* nodules harvested from plants grown under normal photoperiod (N. Ph.), or subjected to 24 and 72 h continuous dark, respectively. Transcript levels of these genes decreased significantly (<2-fold, P<0.05) or increased significantly (>2-fold, P<0.05) under extended dark conditions and are indicated in bold. Genes with decreased expression are marked by an asterisk. Genes with increased expression are marked in italics. The numbers indicate ratios of gene expression after 24 and 72 h continuous dark versus expression in normal photoperiod (control). P value represents the level of significance between the relative gene expression levels (ANOVA).

| GENE                                                                                                          | Lotus gene ID          | Expression Ratio vs Control |               | P                            |
|---------------------------------------------------------------------------------------------------------------|------------------------|-----------------------------|---------------|------------------------------|
|                                                                                                               |                        | 24 h / N. Ph.               | 72 h / N. Ph. |                              |
| <b>Starch metabolism</b>                                                                                      |                        |                             |               |                              |
| soluble starch synthase SSIII, precursor - potato                                                             | TC16679                | 0.31                        | 0.18          | <i>0.106</i>                 |
| Granule-bound glycogen (Starch) synthase                                                                      | TC15808                | 0.22                        | 0.16          | <i>0.046</i>                 |
| *soluble starch synthase { <i>Arabidopsis thaliana</i> ;}<br>glycogen(starch) synthase isoform II precursor - | TC15963                | <b>0.34</b>                 | <b>0.17</b>   | <i>0.024</i>                 |
| Putative starch synthase                                                                                      | TC16015                | 0.38                        | 0.30          | <i>0.13</i>                  |
| Starch branching enzyme (EC 2.4.1.18)                                                                         | TC11131                | 0.27                        | 0.04          | <i>0.072</i>                 |
| Starch branching enzyme I precursor                                                                           | MWM181h06_r<br>TC14733 | 0.46<br>0.47                | 0.41<br>0.34  | <i>0.309</i><br><i>0.052</i> |
| *ADP-glucose pyrophosphorylase small subunit                                                                  | TC8396 5-end           | 0.08                        | <b>0.02</b>   | <i>0.004</i>                 |
| *ADP-glucose pyrophosphorylase small subunit                                                                  | TC8756 3-end           | 0.06                        | <b>0.03</b>   | <i>0.011</i>                 |
| Beta-amylase                                                                                                  | TC14465                | 1.57                        | 2.35          | <i>0.194</i>                 |
| Alpha-amylase                                                                                                 | TC15116                | 0.22                        | 0.24          | <i>0.099</i>                 |
| starch phosphorylase isoform L precursor,<br>Alpha-glucan phosphorylase, H isozyme (Starch)                   | TC14890<br>TC19579     | 0.08<br>0.48                | 0.25<br>0.10  | <i>0.068</i><br><i>0.053</i> |
| <b>Other Carbohydrate metabolism</b>                                                                          |                        |                             |               |                              |
| Cellulose synthase                                                                                            | TC14362                | 0.36                        | 0.30          | <i>0.053</i>                 |
| Cellulose synthase                                                                                            | TC9552                 | 0.98                        | 0.70          | <i>0.557</i>                 |
| <i>Trehalase 1</i>                                                                                            | TC18454                | 1.88                        | <b>2.97</b>   | <i>0.007</i>                 |
| Trehalose-6-phosphate synthase homolog                                                                        | TC8431                 | 0.96                        | 0.34          | <i>0.181</i>                 |
| Trehalose-6-phosphate synthase homolog                                                                        | TC9466                 | 1.92                        | 2.96          | <i>0.134</i>                 |
| *Trehalose-6-phosphate synthase homolog                                                                       | TC14996                | 0.12                        | <b>0.03</b>   | <i>0.004</i>                 |
| *Trehalose-6-phosphate phosphatase                                                                            | LjU20                  | <b>0.29</b>                 | 0.75          | <i>0.012</i>                 |
| *Phosphoglucomutase, cytoplasmic                                                                              | TC14676                | 0.14                        | <b>0.09</b>   | <i>0.025</i>                 |
| *Phosphoglucomutase, cytoplasmic                                                                              | TC14675                | 0.40                        | <b>0.07</b>   | <i>0.036</i>                 |
| Phosphoglucomutase, Chloroplasmic                                                                             | TC10716                | 0.49                        | 0.28          | <i>0.086</i>                 |
| *Glucose-6-phosphate isomerase                                                                                | TC17137                | <b>0.28</b>                 | <b>0.20</b>   | <i>0.033</i>                 |
| *Glucose-6-phosphate isomerase                                                                                | TC17714                | <b>0.38</b>                 | <b>0.40</b>   | <i>0.031</i>                 |
| *Cytosolic phosphoglucose isomerase                                                                           | TC10203                | <b>0.45</b>                 | <b>0.28</b>   | <i>0.025</i>                 |
| Cytosolic phosphoglucose isomerase                                                                            | TC14615                | 0.60                        | 0.32          | <i>0.097</i>                 |
| *Fructokinase                                                                                                 | TC14218                | <b>0.65</b>                 | <b>0.30</b>   | <i>0.004</i>                 |
| *Fructokinase                                                                                                 | TC15313                | 0.52                        | <b>0.33</b>   | <i>0.046</i>                 |
| <i>Beta-fructofuranosidase</i>                                                                                | TC16805                | 1.76                        | <b>3.56</b>   | <i>0.039</i>                 |
| Beta-fructofuranosidase                                                                                       | TC16741                | 1.57                        | 1.10          | <i>0.21</i>                  |
| Fructan 1-exohydrolase                                                                                        | BP071102               | 1.48                        | 1.25          | <i>0.465</i>                 |
| Sucrose synthase LjSUS2                                                                                       | TC17628                | 1.05                        | 0.60          | <i>0.487</i>                 |
| *Sucrose Synthase LjSUS3                                                                                      | TC7847                 | 0.16                        | <b>0.08</b>   | <i>0.004</i>                 |
| *Sucrose Synthase LjSUS1                                                                                      | TC7848                 | <b>0.21</b>                 | <b>0.30</b>   | <i>0.003</i>                 |
| Cell wall invertase                                                                                           | AV407850               | 1.61                        | 2.37          | <i>0.432</i>                 |
| Neutral invertase                                                                                             | TC16464                | 1.97                        | 2.70          | <i>0.067</i>                 |
| Neutral invertase                                                                                             | AV420108               | 1.70                        | 2.53          | <i>0.118</i>                 |
| Alkaline/neutral Invertase LjINV1                                                                             | CAG30577               | 1.05                        | 0.76          | <i>0.56</i>                  |
| *sucrose-UDP glucosyltransferase                                                                              | TC7848                 | <b>0.26</b>                 | <b>0.29</b>   | <i>0.001</i>                 |
| <b>Glycolysis</b>                                                                                             |                        |                             |               |                              |
| Hexokinase-related protein 1                                                                                  | TC16473                | 0.29                        | 0.59          | <i>0.075</i>                 |
| Hexokinase                                                                                                    | BP029610               | 0.26                        | 0.23          | <i>0.05</i>                  |
| *Enolase                                                                                                      | TC14118                | <b>0.36</b>                 | <b>0.13</b>   | <i>0.004</i>                 |

|                                                        |              |             |              |         |
|--------------------------------------------------------|--------------|-------------|--------------|---------|
| Enolase                                                | TC17682      | 0.83        | 0.61         | 0.326   |
| *Enolase                                               | TC16760      | 0.73        | <b>0.17</b>  | 0.004   |
| *Triosephosphate isomerase, chloroplast precursor      | TC8011       | 0.79        | <b>0.23</b>  | 0.04    |
| *Triosephosphate isomerase, cytosolic                  | TC14860      | <b>0.32</b> | <b>0.19</b>  | < 0.001 |
| Pyruvate kinase                                        | TC14988      | 0.91        | 0.54         | 0.104   |
| Pyrophosphate-dependent phosphofructo-1-kinase-        | TC15070      | 0.85        | 0.31         | 0.05    |
| Pyrophosphate-dependent phosphofuctokinase beta        | TC10213      | 0.78        | 0.75         | 0.63    |
| *Pyruvate decarboxylase I                              | Ljnest11h9r  | <b>0.49</b> | <b>0.27</b>  | 0.004   |
| *Pyruvate decarboxylase II                             | TC7922       | <b>0.27</b> | <b>0.17</b>  | < 0.001 |
| *Alcohol dehydrogenase                                 | Ljnest14brc  | <b>0.59</b> | <b>0.21</b>  | < 0.001 |
| <b>Pentose phosphate pathway</b>                       |              |             |              |         |
| *Glucose-6-phosphate 1-dehydrogenase                   | TC8851       | 0.29        | <b>0.06</b>  | 0.004   |
| Glucose-6-phosphate 1-dehydrogenase, cytoplasmic       | TC16472      | 0.53        | 0.71         | 0.052   |
| *6-phosphogluconate dehydrogenase,                     | TC8770       | <b>0.45</b> | <b>0.22</b>  | < 0.001 |
| *Cytosolic 6-phosphogluconate dehydrogenase            | TC15545      | <b>0.53</b> | <b>0.29</b>  | 0.012   |
| *transketolase precursor - potato                      | TC9340       | <b>0.35</b> | <b>0.23</b>  | 0.031   |
| Transaldolase                                          | TC14521      | 0.79        | 0.56         | 0.221   |
| *Transaldolase                                         | TC11589      | 0.02        | <b>0.01</b>  | 0.011   |
| *Transaldolase ToTAL2                                  | TC10369      | 0.18        | <b>0.08</b>  | 0.011   |
| <i>Ribulose-phosphate 3-epimerase, chloroplast</i>     | TC7925       | <b>3.27</b> | <b>2.09</b>  | 0.004   |
| D-ribulose-5-phosphate 3-epimerase                     | TC15403      | 0.90        | 0.70         | 0.476   |
| Putative 6-phosphogluconolactonase                     | LjNEST74h5r  | 0.94        | 1.03         | 0.97    |
| Ribose-5-phosphate isomerase precursor                 | TC7994       | 1.04        | 0.21         | 0.039   |
| Probable ribose 5-phosphate isomerase                  | TC14838      | 0.96        | 0.60         | 0.387   |
| <b>TCA Cycle</b>                                       |              |             |              |         |
| Malate dehydrogenase mitochondrial precursor           | TC7960       | 0.22        | 0.18         | 0.054   |
| *Cytosolic malate dehydrogenase (1.1.1.37)             | TC7834       | 0.28        | <b>0.15</b>  | 0.011   |
| <i>Aconitase (Aconitate hydratase) (Citrate hydro-</i> | TC14176      | <b>8.80</b> | 3.80         | 0.002   |
| <i>Cytosolic aconitase</i>                             | TC15109      | <b>3.09</b> | 2.06         | 0.011   |
| *Aconitate hydratase, cytoplasmic                      | TC14371      | 0.37        | <b>0.16</b>  | 0.004   |
| *Isocitrate dehydrogenase (NAD+) precursor             | TC14549      | <b>0.54</b> | <b>0.28</b>  | 0.011   |
| NADPH-specific isocitrate dehydrogenase                | TC7991       | 1.03        | 0.76         | 0.384   |
| <b>CO<sub>2</sub> metabolism</b>                       |              |             |              |         |
| *Carbonic anhydrase LjCA1                              | TC14306      | 0.01        | <b>0.00</b>  | 0.004   |
| *Carbonic anhydrase a-type 1                           | Ljnest13e5   | <b>0.33</b> | <b>0.13</b>  | < 0.001 |
| *Carbonic anhydrase a-type 2                           | Ljnest20a7rc | 0.20        | <b>0.08</b>  | 0.004   |
| Phosphoenolpyruvate carboxylase                        | TC14124      | 1.33        | 1.98         | 0.132   |
| *Phosphoenolpyruvate carboxylase                       | TC7830       | 0.60        | <b>0.11</b>  | 0.009   |
| *Phosphoenolpyruvate carboxylase kinase                | TC14602      | 0.19        | <b>0.07</b>  | 0.004   |
| NADP-dependent malic enzyme 1.1.1.40                   | TC17304      | 0.90        | 1.96         | 0.093   |
| NADP-dependent malic enzyme 1.1.1.40                   | TC8784       | 0.20        | 0.26         | 0.071   |
| NAD-dependent malic enzyme 1.1.1.39                    | TC16102      | 0.25        | 0.28         | 0.086   |
| RuBisCO subunit binding-protein alpha subunit          | TC8373       | 0.45        | 0.33         | 0.182   |
| *Ribulose biphosphate carboxylase small chain          | TC19857      | 1.19        | <b>0.29</b>  | 0.013   |
| *Ribulose biphosphate carboxylase/oxygenase            | TC14081      | <b>0.17</b> | <b>0.03</b>  | 0.012   |
| <b>Ammonium assimilation</b>                           |              |             |              |         |
| Aspartate aminotransferase                             | TC14495      | 1.33        | 2.36         | 0.244   |
| Glutamine synthetase chloroplastic precursor           | TC14146      | 0.63        | 0.25         | 0.05    |
| *Glutamine synthetase, cytosolic isozyme               | TC8035       | <b>0.39</b> | <b>0.13</b>  | 0.007   |
| *Glutamate dehydrogenase                               | TC10844      | <b>0.20</b> | <b>0.16</b>  | 0.008   |
| <i>NADH glutamate dehydrogenase</i>                    | TC10856      | 6.97        | <b>40.99</b> | 0.004   |
| <i>Asparagine synthase</i>                             | TC14104      | 12.16       | <b>19.19</b> | 0.031   |
| *Asparagine synthase                                   | TC8451       | <b>0.48</b> | <b>0.26</b>  | 0.025   |
| <b>Other aminoacid metabolism</b>                      |              |             |              |         |
| *Alanine:glyoxylate aminotransferase 2 homolog         | TC9107       | 0.48        | <b>0.10</b>  | 0.016   |
| L-asparaginase                                         | TC8339       | 0.78        | 0.85         | 0.785   |
| *Histidinol dehydrogenase                              | TC10151      | <b>0.17</b> | <b>0.06</b>  | 0.004   |
| Glycine dehydrogenase [decarboxylating],               | TC14097      | 1.52        | 0.76         | 0.382   |
| Serine hydroxymethyltransferase (Serine methylase)     | TC9418       | 1.07        | 0.49         | 0.114   |
| Methionine synthase protein                            | TC8911       | 1.85        | 1.50         | 0.482   |
| S-adenosylmethionine synthetase                        | TC14111      | 0.84        | 0.72         | 0.667   |

|                                                    |            |             |              |         |
|----------------------------------------------------|------------|-------------|--------------|---------|
| S-adenosylmethionine synthetase                    | TC14110    | 0.88        | 0.43         | 0.128   |
| Methionine synthase                                | TC14073    | 0.32        | 0.50         | 0.05    |
| Cystathionine-gamma-synthase precursor             | TC19008    | 0.53        | 0.72         | 0.501   |
| Adenosylhomocysteinase                             | TC7865     | 0.51        | 0.45         | 0.094   |
| serine O-acetyltransferase                         | TC11304    | 0.54        | 0.58         | 0.306   |
| *Serine acetyltransferase                          | TC17048    | 0.19        | <b>0.05</b>  | 0.004   |
| *Serine acetyltransferase 1                        | TC18157    | <b>0.48</b> | <b>0.50</b>  | 0.023   |
| Cysteine synthase                                  | TC8523     | 0.82        | 1.78         | 0.213   |
| *Cysteine synthase                                 | TC14692    | 0.15        | <b>0.08</b>  | 0.011   |
| Cysteine synthase, chloroplast precursor           | TC10541    | 0.38        | 0.50         | 0.094   |
| *Plastidic cysteine synthase 1                     | TC17110    | <b>0.03</b> | <b>0.07</b>  | < 0.001 |
| O-acetylserine (Thiol)lyase                        | TC8232     | 0.36        | 0.30         | 0.05    |
| *threonine dehydratase/deaminase                   | TC18952    | <b>0.20</b> | <b>0.17</b>  | < 0.001 |
| *Aspartokinase-homoserine dehydrogenase (HDH)      | TC9572     | 0.07        | <b>0.01</b>  | 0.004   |
| *threonine synthase                                | TC9527     | 0.20        | <b>0.07</b>  | 0.004   |
| *N-acetylornithine deacetylase                     | Ljnest562r | <b>0.38</b> | <b>0.43</b>  | 0.011   |
| *Beta-cyanoalanine synthase                        | TC14185    | <b>0.39</b> | 0.71         | 0.049   |
| *pantoate--beta-alanine ligase                     | TC12836    | <b>0.19</b> | <b>0.14</b>  | < 0.001 |
| Ornithine decarboxylase                            | CAC02644   | 0.53        | 0.47         | 0.112   |
| <i>Ornithine aminotransferase</i>                  | TC8388     | <b>6.31</b> | <b>7.78</b>  | 0.007   |
| *Similarity to ornithine cyclodeaminase            | TC11292    | <b>0.23</b> | <b>0.08</b>  | 0.001   |
| Arginine decarboxylase 1                           | CAE02645   | 0.75        | 1.42         | 0.06    |
| Arginine decarboxylase 2                           | TC5158     | 0.45        | 0.24         | 0.168   |
| proline oxidase                                    | TC7864     | 0.81        | 0.54         | 0.196   |
| Proline dehydrogenase                              | TC7860     | 1.01        | 1.01         | 1       |
| <i>Proline dehydrogenase</i>                       | TC7863     | <b>4.51</b> | <b>10.84</b> | < 0.001 |
| *Prolyl 4-hydroxylase                              | TC15896    | <b>0.29</b> | <b>0.11</b>  | < 0.001 |
| *Prolyl 4-hydroxylase, alpha subunit-like protein  | TC11925    | <b>0.32</b> | <b>0.20</b>  | 0.005   |
| *Probable 2-isopropylmalate synthase               | TC14289    | 0.64        | <b>0.22</b>  | 0.037   |
| *Nitrilase 4 (sp P46011)                           | TC14107    | <b>0.34</b> | <b>0.30</b>  | 0.01    |
| *amino acid acetyltransferase (N-acetylglutamate   | TC18260    | <b>0.58</b> | <b>0.47</b>  | 0.019   |
| amino acid acetyltransferase (N-acetylglutamate    | TC18465    | 1.55        | 1.74         | 0.157   |
| *Branched-chain amino acid aminotransferase-like   | TC16062    | 0.13        | <b>0.01</b>  | 0.004   |
| Anthranilate synthase alpha subunit precursor      | TC10990    | 1.13        | 0.16         | 0.049   |
| 3-deoxy-D-arabino-heptulosonate 7-phosphate        | TC8510     | 0.74        | 0.52         | 0.149   |
| <b>Other metabolism</b>                            |            |             |              |         |
| Phenylalanine ammonia-lyase 1                      | TC9381     | 1.11        | 0.87         | 0.816   |
| *Chalcone reductase                                | TC8351     | 0.01        | <b>0.00</b>  | 0.011   |
| Chalcone synthase 4 (Naringenin-chalcone synthase  | TC7870     | 2.94        | 3.53         | 0.115   |
| mRNA for chalcone isomerase (chi gene)             | NP645869   | 0.40        | 1.46         | 0.065   |
| <i>4-hydroxyphenylpyruvate dioxygenase (4HPPD)</i> | TC8682     | 3.51        | <b>4.93</b>  | 0.037   |
| *Putative flavanone 3-hydroxylase                  | TC7931     | 0.40        | <b>0.14</b>  | 0.004   |
| <i>Cytochrome P450, Isoflavone synthase</i>        | TC14262    | 1.76        | <b>3.16</b>  | 0.013   |
| Probable hydroquinone glucosyltransferase          | TC16353    | 0.31        | 0.53         | 0.096   |
| *14-3-3 protein GF14omega (grf2)                   | TC7839     | <b>0.31</b> | <b>0.43</b>  | 0.008   |
| monodehydroascorbate reductase (NADH)              | TC15657    | 0.67        | 0.77         | 0.136   |
| *acidic endochitinase                              | TC14167    | <b>0.16</b> | <b>0.04</b>  | < 0.001 |
| *thiazole biosynthetic enzyme precursor            | TC14068    | 0.06        | <b>0.02</b>  | 0.004   |
| <i>chalcone isomerase</i>                          | NP591666   | <b>4.05</b> | <b>4.47</b>  | < 0.001 |
| putative chalcone isomerase                        | NP591668   | 0.91        | 1.51         | 0.209   |
| <i>Isoflavone reductase</i>                        | TC7899     | 1.89        | <b>5.52</b>  | < 0.001 |
| *Cytochrome P450                                   | TC15466    | <b>0.33</b> | <b>0.04</b>  | 0.004   |
| *cytochrome P450                                   | TC8343     | <b>0.05</b> | <b>0.01</b>  | < 0.001 |
| <i>Trans-cinnamate 4-monooxygenase</i>             | TC14933    | 1.57        | <b>2.83</b>  | 0.046   |
| <i>Putative oxidoreductase</i>                     | TC14685    | 0.81        | <b>4.10</b>  | 0.026   |
| *N-hydroxycinnamoyl/benzoyltransferase-like        | TC8570     | 0.23        | <b>0.08</b>  | 0.004   |
| *Isoliquiritigenin 2'-O-methyltransferase          | TC14525    | <b>0.35</b> | <b>0.17</b>  | < 0.001 |
| *4-coumarate:CoA ligase 2                          | TC7977     | <b>0.47</b> | <b>0.16</b>  | 0.003   |
| *Laccase                                           | TC17617    | 0.04        | <b>0.02</b>  | 0.025   |
| *Putative diphenol oxidase                         | GENf079a06 | <b>0.45</b> | <b>0.27</b>  | 0.005   |
| Amine oxidase                                      | TC11726    | 0.86        | 0.73         | 0.336   |

|                                                                          |             |             |             |         |
|--------------------------------------------------------------------------|-------------|-------------|-------------|---------|
| *Pyrroline-5-carboxylate reductase                                       | TC15604     | <b>0.25</b> | <b>0.17</b> | < 0.001 |
| Delta-1-pyrroline-5-carboxylate dehydrogenase                            | TC8648      | 0.65        | 0.99        | 0.364   |
| Choline monooxygenase                                                    | TC17741     | 2.24        | 0.69        | 0.059   |
| Betaine aldehyde dehydrogenase                                           | TC16536     | 1.09        | 0.86        | 0.683   |
| <i>NAD-dependent sorbitol dehydrogenase</i>                              | TC17752     | <b>8.46</b> | 3.33        | 0.004   |
| NAD-dependent mannitol dehydrogenase                                     | TC10721     | <b>1.86</b> | 1.51        | 0.025   |
| *Uricase                                                                 | TC14572     | <b>0.24</b> | <b>0.32</b> | 0.01    |
| Adenosine 5' phosphosulfate reductase                                    | TC14588     | 0.88        | 0.50        | 0.068   |
| *Aminodeoxychorismate synthase/glutamine<br>dihydrodipicolinate synthase | TC15188     | <b>0.30</b> | <b>0.33</b> | 0.032   |
| 1-aminocyclopropane-1-carboxylate oxidase                                | TC18091     | 0.80        | 0.69        | 0.339   |
|                                                                          | TC14222     | 0.80        | 0.35        | 0.065   |
| *Spermine synthase                                                       | Ljnest12b2r | 0.72        | <b>0.29</b> | 0.03    |
| *Spermidine synthase                                                     | TC10068     | <b>0.42</b> | <b>0.46</b> | 0.005   |
| putative NADP-GDH                                                        | Ljnest22b7r | 0.88        | 0.99        | 0.947   |
| *NADPH-dependent mannose 6-phosphate reductase                           | TC15046     | <b>0.17</b> | <b>0.23</b> | < 0.001 |

---



**Figure S1.** Starch accumulation in leaves and nodules of *L. japonicus* plants grown under normal photoperiod conditions and after being subjected to 72 hours of continuous darkness, respectively. Starch is stained blue/black by iodine. After 72 hours of continuous darkness the starch has been exhausted completely. Bars indicate 100  $\mu\text{m}$  in leaves and 1  $\mu\text{m}$  in nodules.

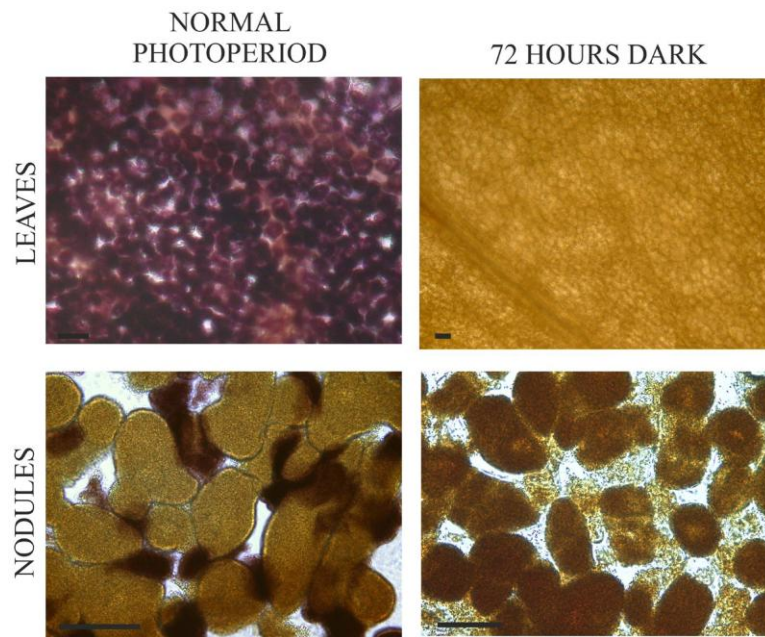

**Figure S2.** Ethylene (ppm) produced at different time points (after 1-, 2- and 3-h incubation) during the acetylene reduction assay. Measurements were taken from *L. japonicus* plants grown under normal photoperiod (**A**), after the plants had been subjected to extended dark periods for 24 (**B**) and 72 hours (**D**), and after 48 h recovery under normal photoperiod following the 24 h dark (**C**) and the 72 h dark (**E**) periods, respectively. Error bars refer to six biological replications.

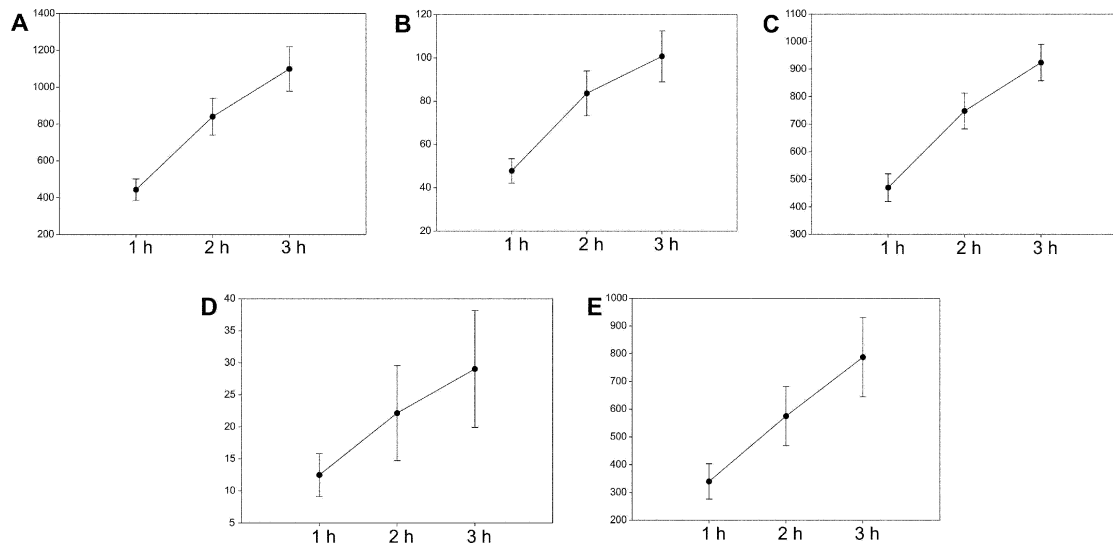

Supplement: supp_ert015_jexbot088963_file001.pdf [file supp_ert015_jexbot088963_file001.pdf]
